# Supplementary material for: Formaldehyde and Epigenetic Alterations: MicroRNA Changes in the Nasal Epithelium of Nonhuman Primates
Source: PubMed Central journal article supplement (PMC3621188; doi:10.1289/ehp.1205582), 2013-01-15

# Supplemental Material

## Formaldehyde and Epigenetic Alterations: MicroRNA Changes in the Nasal Epithelium of Nonhuman Primates

Julia E. Rager,<sup>1</sup> Benjamin C. Moeller,<sup>2</sup> Melanie Doyle-Eisele,<sup>3</sup> Dean Kracko,<sup>3</sup>  
James A. Swenberg,<sup>1,2,4</sup> and Rebecca C. Fry<sup>1,2,\*</sup>

<sup>1</sup> Department of Environmental Sciences and Engineering, Gillings School of Global Public Health, The University of North Carolina, Chapel Hill, North Carolina, USA

<sup>2</sup> Curriculum in Toxicology, The University of North Carolina, Chapel Hill, North Carolina, USA

<sup>3</sup> Lovelace Respiratory Research Institute, Albuquerque, New Mexico, USA

<sup>4</sup> Center for Environmental Health and Susceptibility, Gillings School of Global Public Health, The University of North Carolina, Chapel Hill, North Carolina, USA.

# Supplemental Material

## Table of Contents

|                                                                                                                                           |          |
|-------------------------------------------------------------------------------------------------------------------------------------------|----------|
| <b>Supplemental Material, Table S1:</b> Transcriptional targets predicted to be regulated by miR-125b.....                                | <b>3</b> |
| <b>Supplemental Material, Table S2:</b> Transcriptional targets predicted to be regulated by miR-142-3p .....                             | <b>7</b> |
| <b>Supplemental Material, Table S3:</b> Pathways significantly associated with the predicted targets of miR-142-3p.....                   | <b>8</b> |
| <b>Supplemental Material, Figure S1:</b> Predicted mRNA targets of formaldehyde-altered miR-125b are involved in apoptosis signaling..... | <b>9</b> |

**Supplemental Material, Table S1: Transcriptional targets predicted to be regulated by miR-125b.** P<sub>CT</sub> refers to the probability of preferentially conserved targeting.

| Target          | Full Name                                                                                                        | Context Score | P <sub>CT</sub> |
|-----------------|------------------------------------------------------------------------------------------------------------------|---------------|-----------------|
| <i>GCNT1</i>    | glucosaminyl (N-acetyl) transferase 1, core 2 (beta-1,6-N-acetylglucosaminyltransferase)                         | -0.67         | > 0.99          |
| <i>TMEM86A</i>  | transmembrane protein 86A                                                                                        | -0.26         | > 0.99          |
| <i>PODXL</i>    | podocalyxin-like                                                                                                 | -0.47         | > 0.99          |
| <i>ARID3B</i>   | AT rich interactive domain 3B (BRIGHT-like)                                                                      | -0.51         | > 0.99          |
| <i>FLJ20309</i> | hypothetical protein FLJ20309                                                                                    | -0.37         | 0.99            |
| <i>SH3TC2</i>   | SH3 domain and tetratricopeptide repeats 2                                                                       | -0.73         | 0.99            |
| <i>PHF15</i>    | PHD finger protein 15                                                                                            | -0.31         | 0.98            |
| <i>GJC1</i>     | gap junction protein, gamma 1, 45kDa                                                                             | -0.37         | 0.98            |
| <i>KLF13</i>    | Kruppel-like factor 13                                                                                           | -0.51         | 0.97            |
| <i>OLFML2A</i>  | olfactomedin-like 2A                                                                                             | -0.49         | 0.97            |
| <i>MFHAS1</i>   | malignant fibrous histiocytoma amplified sequence 1                                                              | -0.52         | 0.97            |
| <i>IRF4</i>     | interferon regulatory factor 4                                                                                   | -0.58         | 0.97            |
| <i>RAPGEF5</i>  | Rap guanine nucleotide exchange factor (GEF) 5                                                                   | -0.39         | 0.97            |
| <i>LBH</i>      | limb bud and heart development homolog (mouse)                                                                   | -0.37         | 0.97            |
| <i>ENPP1</i>    | ectonucleotide pyrophosphatase/phosphodiesterase 1                                                               | -0.4          | 0.97            |
| <i>UBN1</i>     | ubiquitin 1                                                                                                      | -0.33         | 0.97            |
| <i>FAM176A</i>  | family with sequence similarity 176, member A                                                                    | -0.33         | 0.97            |
| <i>MXD4</i>     | MAX dimerization protein 4                                                                                       | -0.07         | 0.97            |
| <i>SMURF1</i>   | SMAD specific E3 ubiquitin protein ligase 1                                                                      | -0.24         | 0.97            |
| <i>TLE3</i>     | transducin-like enhancer of split 3 (E(sp1) homolog, Drosophila)                                                 | -0.2          | 0.97            |
| <i>TRPS1</i>    | trichorhinophalangeal syndrome I                                                                                 | -0.19         | 0.97            |
| <i>KIAA1522</i> | KIAA1522                                                                                                         | -0.37         | 0.97            |
| <i>ASAH3L</i>   | N-acylsphingosine amidohydrolase 3-like                                                                          | -0.34         | 0.97            |
| <i>UBE2R2</i>   | ubiquitin-conjugating enzyme E2R 2                                                                               | -0.36         | 0.97            |
| <i>SEMA4D</i>   | sema domain, immunoglobulin domain (Ig), transmembrane domain (TM) and short cytoplasmic domain, (semaphorin) 4D | -0.42         | 0.97            |
| <i>LIN28</i>    | lin-28 homolog (C. elegans)                                                                                      | -0.27         | 0.97            |
| <i>CPSF6</i>    | cleavage and polyadenylation specific factor 6, 68kDa                                                            | -0.34         | 0.97            |
| <i>TGOLN2</i>   | trans-golgi network protein 2                                                                                    | -0.39         | 0.97            |
| <i>OSBPL9</i>   | oxysterol binding protein-like 9                                                                                 | -0.45         | 0.97            |
| <i>TBC1D1</i>   | TBC1 (tre-2/USP6, BUB2, cdc16) domain family, member 1                                                           | -0.36         | 0.97            |
| <i>SLC39A9</i>  | solute carrier family 39 (zinc transporter), member 9                                                            | -0.47         | 0.96            |
| <i>ENPEP</i>    | glutamyl aminopeptidase (aminopeptidase A)                                                                       | -0.52         | 0.96            |
| <i>ST8SIA4</i>  | ST8 alpha-N-acetyl-neuraminidase alpha-2,8-sialyltransferase 4                                                   | -0.26         | 0.96            |
| <i>GRB10</i>    | growth factor receptor-bound protein 10                                                                          | -0.43         | 0.96            |
| <i>MYT1</i>     | myelin transcription factor 1                                                                                    | -0.39         | 0.96            |

| <b>Target</b>   | <b>Full Name</b>                                                                                                    | <b>Context Score</b> | <b>P<sub>CT</sub></b> |
|-----------------|---------------------------------------------------------------------------------------------------------------------|----------------------|-----------------------|
| <i>STARD13</i>  | StAR-related lipid transfer (START) domain containing 13                                                            | -0.99                | 0.96                  |
| <i>PTAR1</i>    | protein prenyltransferase alpha subunit repeat containing 1                                                         | -0.26                | 0.96                  |
| <i>BMF</i>      | Bcl2 modifying factor                                                                                               | -0.38                | 0.96                  |
| <i>ZNRF3</i>    | zinc and ring finger 3                                                                                              | -0.24                | 0.96                  |
| <i>ZSCAN29</i>  | zinc finger and SCAN domain containing 29                                                                           | -0.58                | 0.96                  |
| <i>SPTB</i>     | spectrin, beta, erythrocytic (includes spherocytosis, clinical type I)                                              | -0.29                | 0.96                  |
| <i>NIN</i>      | ninein (GSK3B interacting protein)                                                                                  | -0.38                | 0.96                  |
| <i>SMG1</i>     | PI-3-kinase-related kinase SMG-1                                                                                    | -0.31                | 0.96                  |
| <i>NUP210</i>   | nucleoporin 210kDa                                                                                                  | -0.55                | 0.96                  |
| <i>GGA2</i>     | golgi associated, gamma adaptin ear containing, ARF binding protein 2                                               | -0.31                | 0.96                  |
| <i>DUS1L</i>    | dihydrouridine synthase 1-like ( <i>S. cerevisiae</i> )                                                             | -0.48                | 0.96                  |
| <i>MTF1</i>     | metal-regulatory transcription factor 1                                                                             | -0.33                | 0.96                  |
| <i>C14orf43</i> | chromosome 14 open reading frame 43                                                                                 | -0.13                | 0.96                  |
| <i>PPAT</i>     | phosphoribosyl pyrophosphate amidotransferase                                                                       | -0.43                | 0.96                  |
| <i>SMEK1</i>    | SMEK homolog 1, suppressor of mek1 ( <i>Dictyostelium</i> )                                                         | -0.61                | 0.96                  |
| <i>ORC2L</i>    | origin recognition complex, subunit 2-like (yeast)                                                                  | -0.33                | 0.96                  |
| <i>ACHE</i>     | acetylcholinesterase (Yt blood group)                                                                               | -0.57                | 0.96                  |
| <i>CGN</i>      | cingulin                                                                                                            | -0.43                | 0.95                  |
| <i>LRP4</i>     | low density lipoprotein receptor-related protein 4                                                                  | -0.28                | 0.95                  |
| <i>C6orf47</i>  | chromosome 6 open reading frame 47                                                                                  | -0.3                 | 0.95                  |
| <i>TMEM77</i>   | transmembrane protein 77                                                                                            | -0.5                 | 0.95                  |
| <i>KCNA1</i>    | potassium voltage-gated channel, shaker-related subfamily, member 1 (episodic ataxia with myokymia)                 | -0.24                | 0.95                  |
| <i>KIAA0174</i> | KIAA0174                                                                                                            | -0.29                | 0.95                  |
| <i>LFNG</i>     | LFNG O-fucosylpeptide 3-beta-N-acetylglucosaminyltransferase                                                        | -0.48                | 0.95                  |
| <i>HIC2</i>     | hypermethylated in cancer 2                                                                                         | -0.02                | 0.95                  |
| <i>TNFAIP3</i>  | tumor necrosis factor, alpha-induced protein 3                                                                      | -0.29                | 0.95                  |
| <i>CASP2</i>    | caspase 2, apoptosis-related cysteine peptidase (neural precursor cell expressed, developmentally down-regulated 2) | -0.25                | 0.95                  |
| <i>CRB2</i>     | crumbs homolog 2 ( <i>Drosophila</i> )                                                                              | -0.44                | 0.95                  |
| <i>KIAA0317</i> | KIAA0317                                                                                                            | -0.13                | 0.95                  |
| <i>SCARB1</i>   | scavenger receptor class B, member 1                                                                                | -0.34                | 0.95                  |
| <i>ANPEP</i>    | alanyl (membrane) aminopeptidase (aminopeptidase N, aminopeptidase M, microsomal aminopeptidase, CD13, p150)        | -0.3                 | 0.95                  |
| <i>PSTPIP2</i>  | proline-serine-threonine phosphatase interacting protein 2                                                          | -0.39                | 0.95                  |
| <i>CYP24A1</i>  | cytochrome P450, family 24, subfamily A, polypeptide 1                                                              | -0.41                | 0.95                  |
| <i>ZSWIM5</i>   | zinc finger, SWIM-type containing 5                                                                                 | -0.4                 | 0.95                  |

| <b>Target</b>   | <b>Full Name</b>                                                                                                 | <b>Context Score</b> | <b>P<sub>CT</sub></b> |
|-----------------|------------------------------------------------------------------------------------------------------------------|----------------------|-----------------------|
| <i>NCAN</i>     | neurocan                                                                                                         | -0.23                | 0.95                  |
| <i>TNFSF4</i>   | tumor necrosis factor (ligand) superfamily, member 4 (tax-transcriptionally activated glycoprotein 1, 34kDa)     | -0.49                | 0.95                  |
| <i>NECAB3</i>   | N-terminal EF-hand calcium binding protein 3                                                                     | -0.39                | 0.95                  |
| <i>SLC6A17</i>  | solute carrier family 6, member 17                                                                               | -0.22                | 0.95                  |
| <i>LRFN2</i>    | leucine rich repeat and fibronectin type III domain containing 2                                                 | -0.25                | 0.95                  |
| <i>FAM134A</i>  | family with sequence similarity 134, member A                                                                    | -0.25                | 0.95                  |
| <i>C11orf57</i> | chromosome 11 open reading frame 57                                                                              | -0.28                | 0.94                  |
| <i>CACNB1</i>   | calcium channel, voltage-dependent, beta 1 subunit                                                               | -0.08                | 0.94                  |
| <i>NIPA1</i>    | non imprinted in Prader-Willi/Angelman syndrome 1                                                                | -0.18                | 0.94                  |
| <i>GTPBP2</i>   | GTP binding protein 2                                                                                            | -0.39                | 0.94                  |
| <i>EBF4</i>     | early B-cell factor 4                                                                                            | -0.24                | 0.94                  |
| <i>CDR2L</i>    | cerebellar degeneration-related protein 2-like                                                                   | -0.2                 | 0.94                  |
| <i>ETV6</i>     | ets variant gene 6 (TEL oncogene)                                                                                | -0.31                | 0.94                  |
| <i>RAPGEFL1</i> | Rap guanine nucleotide exchange factor (GEF)-like 1                                                              | -0.22                | 0.94                  |
| <i>CGREF1</i>   | cell growth regulator with EF-hand domain 1                                                                      | -0.35                | 0.94                  |
| <i>CCNJ</i>     | cyclin J                                                                                                         | -0.46                | 0.94                  |
| <i>KCNIP3</i>   | Kv channel interacting protein 3, calsenilin                                                                     | -0.25                | 0.94                  |
| <i>PSCD1</i>    | pleckstrin homology, Sec7 and coiled-coil domains 1(cytohesin 1)                                                 | -0.3                 | 0.93                  |
| <i>CTF8</i>     | chromosome transmission fidelity factor 8 homolog (S. cerevisiae)                                                | -0.38                | 0.93                  |
| <i>MSH1</i>     | musashi homolog 1 (Drosophila)                                                                                   | -0.21                | 0.93                  |
| <i>TAF9B</i>    | TAF9B RNA polymerase II, TATA box binding protein (TBP)-associated factor, 31kDa                                 | -0.39                | 0.93                  |
| <i>SGPL1</i>    | sphingosine-1-phosphate lyase 1                                                                                  | -0.25                | 0.93                  |
| <i>TMPRSS13</i> | transmembrane protease, serine 13                                                                                | -0.31                | 0.93                  |
| <i>SEMA4C</i>   | sema domain, immunoglobulin domain (Ig), transmembrane domain (TM) and short cytoplasmic domain, (semaphorin) 4C | -0.28                | 0.93                  |
| <i>CDH5</i>     | cadherin 5, type 2, VE-cadherin (vascular epithelium)                                                            | -0.43                | 0.93                  |
| <i>ABHD6</i>    | abhydrolase domain containing 6                                                                                  | -0.31                | 0.93                  |
| <i>ENTPD4</i>   | ectonucleoside triphosphate diphosphohydrolase 4                                                                 | -0.22                | 0.92                  |
| <i>ZFYVE1</i>   | zinc finger, FYVE domain containing 1                                                                            | -0.37                | 0.92                  |
| <i>MTUS1</i>    | mitochondrial tumor suppressor 1                                                                                 | -0.23                | 0.92                  |
| <i>ATXN1</i>    | ataxin 1                                                                                                         | -0.19                | 0.92                  |
| <i>LNPEP</i>    | leucyl/cystinyl aminopeptidase                                                                                   | -0.25                | 0.92                  |
| <i>DIRAS1</i>   | DIRAS family, GTP-binding RAS-like 1                                                                             | -0.3                 | 0.92                  |
| <i>ESRRA</i>    | estrogen-related receptor alpha                                                                                  | -0.37                | 0.92                  |
| <i>SH3BP4</i>   | SH3-domain binding protein 4                                                                                     | -0.28                | 0.92                  |
| <i>ICHTHYIN</i> | ichthyin protein                                                                                                 | -0.51                | 0.92                  |
| <i>SUV39H1</i>  | suppressor of variegation 3-9 homolog 1 (Drosophila)                                                             | -0.3                 | 0.92                  |
| <i>MTMR3</i>    | myotubularin related protein 3                                                                                   | -0.2                 | 0.92                  |
| <i>FAM118A</i>  | family with sequence similarity 118, member A                                                                    | -0.27                | 0.92                  |

| <b>Target</b>   | <b>Full Name</b>                                                        | <b>Context Score</b> | <b>P<sub>CT</sub></b> |
|-----------------|-------------------------------------------------------------------------|----------------------|-----------------------|
| <i>RBM38</i>    | RNA binding motif protein 38                                            | -0.2                 | 0.92                  |
| <i>EIF5A2</i>   | eukaryotic translation initiation factor 5A2                            | -0.15                | 0.92                  |
| <i>FAM116A</i>  | family with sequence similarity 116, member A                           | -0.33                | 0.92                  |
| <i>CDC42SE1</i> | CDC42 small effector 1                                                  | -0.29                | 0.92                  |
| <i>HCN3</i>     | hyperpolarization activated cyclic nucleotide-gated potassium channel 3 | -0.34                | 0.92                  |
| <i>USP37</i>    | ubiquitin specific peptidase 37                                         | -0.19                | 0.91                  |
| <i>KIAA0644</i> | KIAA0644 gene product                                                   | -0.33                | 0.91                  |
| <i>FUT4</i>     | fucosyltransferase 4 (alpha (1,3) fucosyltransferase, myeloid-specific) | -0.65                | 0.91                  |
| <i>RND2</i>     | Rho family GTPase 2                                                     | -0.31                | 0.91                  |
| <i>SOX11</i>    | SRY (sex determining region Y)-box 11                                   | -0.41                | 0.91                  |
| <i>FBXO45</i>   | F-box protein 45                                                        | -0.29                | 0.91                  |
| <i>PCSK7</i>    | proprotein convertase subtilisin/kexin type 7                           | -0.28                | 0.91                  |
| <i>TP53INP1</i> | tumor protein p53 inducible nuclear protein 1                           | -0.29                | 0.91                  |
| <i>MCL1</i>     | myeloid cell leukemia sequence 1 (BCL2-related)                         | -0.42                | 0.91                  |
| <i>EAF1</i>     | ELL associated factor 1                                                 | -0.12                | 0.91                  |
| <i>NFIB</i>     | nuclear factor I/B                                                      | -0.09                | 0.91                  |
| <i>LIFR</i>     | leukemia inhibitory factor receptor alpha                               | -0.28                | 0.91                  |
| <i>MAN1B1</i>   | mannosidase, alpha, class 1B, member 1                                  | -0.3                 | 0.91                  |
| <i>NEU1</i>     | sialidase 1 (lysosomal sialidase)                                       | -0.4                 | 0.91                  |
| <i>BAK1</i>     | BCL2-antagonist/killer 1                                                | -0.56                | 0.9                   |
| <i>SLC35A4</i>  | solute carrier family 35, member A4                                     | -0.34                | 0.9                   |
| <i>KIAA1244</i> | KIAA1244                                                                | -0.18                | 0.9                   |
| <i>MAP2K7</i>   | mitogen-activated protein kinase kinase 7                               | -0.26                | 0.9                   |
| <i>VDR</i>      | vitamin D (1,25- dihydroxyvitamin D3) receptor                          | -0.26                | 0.9                   |
| <i>SLC39A13</i> | solute carrier family 39 (zinc transporter), member 13                  | -0.24                | 0.9                   |

**Supplemental Material, Table S2: Transcriptional targets predicted to be regulated by miR-142-3p.** P<sub>CT</sub> refers to the probability of preferentially conserved targeting.

| <b>Target</b>    | <b>Full Name</b>                                    | <b>Context Score</b> | <b>P<sub>CT</sub></b> |
|------------------|-----------------------------------------------------|----------------------|-----------------------|
| <i>ASH1L</i>     | ash1 (absent, small, or homeotic)-like (Drosophila) | -0.59                | > 0.99                |
| <i>RICTOR</i>    | rapamycin-insensitive companion of mTOR             | -0.57                | > 0.99                |
| <i>ITGB8</i>     | integrin, beta 8                                    | -0.62                | 0.98                  |
| <i>C20orf194</i> | chromosome 20 open reading frame 194                | -0.72                | 0.97                  |
| <i>SNF1LK</i>    | SNF1-like kinase                                    | -0.39                | 0.97                  |
| <i>FAM44B</i>    | family with sequence similarity 44, member B        | -0.65                | 0.95                  |
| <i>C10orf18</i>  | chromosome 10 open reading frame 18                 | -0.87                | 0.95                  |
| <i>ZCCHC14</i>   | zinc finger, CCHC domain containing 14              | -0.5                 | 0.94                  |
| <i>AFF1</i>      | AF4/FMR2 family, member 1                           | -0.25                | 0.94                  |
| <i>EML4</i>      | echinoderm microtubule associated protein like 4    | -0.42                | 0.93                  |
| <i>LCOR</i>      | ligand dependent nuclear receptor corepressor       | -0.33                | 0.93                  |
| <i>CCDC6</i>     | coiled-coil domain containing 6                     | -0.33                | 0.92                  |
| <i>BNC2</i>      | basonuclin 2                                        | -0.32                | 0.9                   |

**Supplemental Material, Table S3: Pathways significantly associated with the predicted targets of miR-142-3p.**

---

| <b>Canonical Pathways</b>                               | <b>p-value</b> | <b>miR-142-3p Predicted Targets</b> |
|---------------------------------------------------------|----------------|-------------------------------------|
| ILK Signaling                                           | 0.008          | <i>ITGB8, RICTOR</i>                |
| Role of IL-17F in Allergic Inflammatory Airway Diseases | 0.031          | <i>SIK1</i>                         |
| Macropinocytosis Signaling                              | 0.048          | <i>ITGB8</i>                        |



**Supplemental Material, Figure S1: Predicted mRNA targets of formaldehyde-altered miR-125b are involved in apoptosis signaling.** The apoptosis signaling pathway is illustrated, where molecules predicted to be targeted by miR-125b are shaded in dark grey.

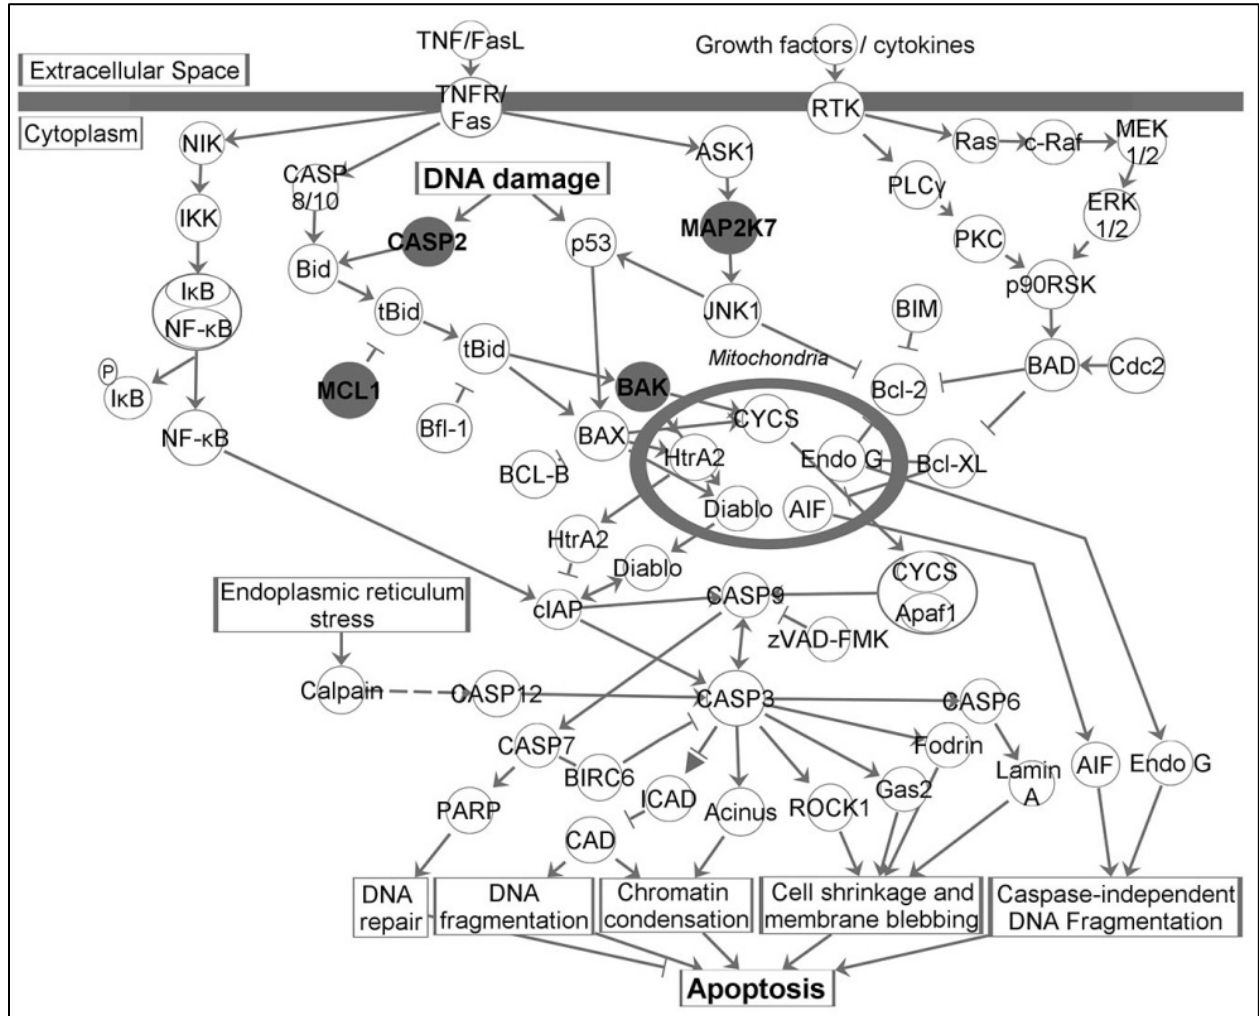

Supplement: ehp.1205582.s001.pdf [file ehp.1205582.s001.pdf]
